# Supplementary material
Source: publisher figshare collection journal article supplement (https://acs.figshare.com/ndownloader/files/5702349)
Supplement: Supplementary file 1 [file 5702349]

# Inorganic Chemistry

including bioinorganic chemistry

Inorg. Chem., 1996, 35(7), 1751-1752, DOI: [10.1021/ic950734q](https://doi.org/10.1021/ic950734q)

## Terms & Conditions

Electronic Supporting Information files are available without a subscription to ACS Web Editions. The American Chemical Society holds a copyright ownership interest in any copyrightable Supporting Information. Files available from the ACS website may be downloaded for personal use only. Users are not otherwise permitted to reproduce, republish, redistribute, or sell any Supporting Information from the ACS website, either in whole or in part, in either machine-readable form or any other form without permission from the American Chemical Society. For permission to reproduce, republish and redistribute this material, requesters must process their own requests via the RightsLink permission system. Information about how to use the RightsLink permission system can be found at <http://pubs.acs.org/page/copyright/permissions.html>

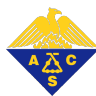

ACS Publications

MOST TRUSTED. MOST CITED. MOST READ.

Copyright © 1996 American Chemical Society

# Diruthenium Cofacial Diporphyrins Axially-Bound to a Gold-Supported, Self-Assembled Monolayer Electrocatalytically Reduce Dioxide

James P. Collman\*, Matthew S. Ennis, David A. Offord, Leng Leng Chng, and John H. Griffin\*

*Contribution from the Department of Chemistry, Stanford University, Stanford, California 94305*

## Supplementary Material

$(\mu\text{-N}_2)\text{Ru}_2(\text{DPB})(\text{CH}_3\text{CN})_2$ : In an inert atmosphere ( $\text{N}_2$ ) box, a 25-mL round bottom flask charged with  $\text{Ru}_2(\text{DPB})$  (25 mg, 0.019 mmol) and acetonitrile (10 mL) was stirred for 5 h. The acetonitrile was then removed in *vacuo*. The residue was redissolved in toluene (5 mL) and stirred in the dinitrogen atmosphere for 24 h. The solvent was removed in *vacuo* leaving the dinitrogen complex (22 mg, 0.015 mmol, 79% yield). UV-VIS ( $\text{CH}_2\text{Cl}_2$ )  $\lambda_{\text{max}}$  394 (Soret), 530 nm.  $^1\text{H}$  NMR ( $\text{C}_6\text{D}_6$ ) porphyrin resonances:  $\text{H}_{\text{meso}}$  9.22 (s, 4H), 9.02 (s, 2H);  $-\text{CH}_3$  3.53 (s, 12 H), 3.14 (s, 12 H);  $-\text{CH}_2\text{CH}_3$  1.78 (t, 12H), 1.69 (t, 12H);  $-\text{CH}_2\text{CH}_3$  4.28 (m, 4H), 3.94 (m, 4H) 3.54 (m, 8H); biphenylene 7.39 (d, 2H), 7.18 (d, 2H), 6.90 (t, 2H);  $\text{NCCCH}_3$  -3.10 (s, 6H) ppm. Addition of 2 eq. of 1-*tert*-butyl-5-phenylimidazole went cleanly to the thoroughly characterized  $(\mu\text{-N}_2)\text{Ru}_2\text{DPB}(\text{*Im})_2$ . Collman, J. P.; Hutchison, J. E.; Lopez, M. A.; Guillard, R.; Reed, R. A. *J. Am. Chem. Soc.* **1991**, *113*, 2794-2796.

$(\mu\text{-N}_2)\text{Ru}_2(\text{DPA})(\text{CH}_3\text{CN})_2$ : A 250-mL photolysis well charged with  $\text{Ru}_2(\text{DPA})(\text{CO})_2(\text{CH}_3\text{OH})_2$  (50 mg, 0.039 mmol), benzene (20 mL), and acetonitrile (200

mL) was irradiated under an argon purge for 5 h following standard literature procedures (Anipas, A.; Buchler, J. W.; Gouterman, M.; Smith, P. D. *J. Am. Chem. Soc.* **1978**, *100*, 3015-3024). The reaction mixture was then transferred to an argon-sparged side-arm flask via a cannula, and the acetonitrile removed in *vacuo*. The resulting solid was purified, in an inert (N<sub>2</sub>) atmosphere box, by column chromatography on neutral alumina. A 50/50 mixture of acetonitrile and THF used as eluant caused the product to come off as the major dark-red band. The solvent was removed in *vacuo* and the product was stirred in toluene, open to the dinitrogen atmosphere, for 24 h. The pure product was isolated with the vacuum removal of the toluene (31 mg, 0.022 mM, 55% yield). UV-VIS (CH<sub>2</sub>Cl<sub>2</sub>)  $\lambda_{\text{max}}$  394 (Soret), 528 nm. <sup>1</sup>H NMR (C<sub>6</sub>D<sub>6</sub>) porphyrin resonances: H<sub>meso</sub> 9.07 (s, 2H), 8.99 (s, 4H); -CH<sub>3</sub> 3.35 (s, 12 H), 2.10 (s, 12 H); -CH<sub>2</sub>CH<sub>3</sub> 1.96 (t, 12H), 1.63 (t, 12H); -CH<sub>2</sub>CH<sub>3</sub> 4.10 (m, 4H), 3.87 (m, 8H) 3.52 (m, 4H); anthracene 9.00 (s, 1H), 8.74 (s, 1H), 8.33 (d, 2H), 8.07 (d, 2H), 7.58 (t, 2H); NCCCH<sub>3</sub> -3.04 (s, 6H) ppm. Addition of 2 eq. of 1-*tert*-butyl-5-phenylimidazole went cleanly to the thoroughly characterized ( $\mu$ -N<sub>2</sub>)Ru<sub>2</sub>DPA(\*Im)<sub>2</sub>. Collman, J. P.; Ennis, M. S., unpublished results). This complex shows analogous chemistry and characteristics to the shorter ( $\mu$ -N<sub>2</sub>)Ru<sub>2</sub>DPB(\*Im)<sub>2</sub>.
